# Supplementary material for: Viscoelastic and structural properties of poly(vinyl alcohol)/poly(vinylpyrrolidone) hydrogels
Source: Royal Society of Chemistry journal article supplement (doi:10.1039/c6ra04319d), 2016-01-01
Supplement: c6ra04319d2.pdf [file c6ra04319d2.pdf]

**Supporting Information to the article**

**Viscoelastic and structural properties of poly(vinyl alcohol)/poly(vinylpyrrolidone) hydrogels**

Mirela Teodorescu,<sup>\*a</sup> Simona Morariu,<sup>\*a</sup> Maria Bercea<sup>a</sup> and Liviu Sacarescu<sup>a</sup>

Visualization of the original shape recovery after compression for PVA/PVP hydrogel with 10% PVP prepared by applying 9 freezing/thawing cycles.

---

<sup>a</sup> "Petru Poni" Institute of Macromolecular Chemistry of Romanian Academy, 41-A Grigore Ghica Voda Alley, 700487 Iasi, Romania.

<sup>\*</sup>Both authors contributed equally to this manuscript. *E-mail*: teodorescu.mirela@icmpp.ro (M. Teodorescu); smorariu@icmpp.ro (S. Morariu)
